# Supplementary material for: Pentafluorosulfanylated polymers as electrets in nonvolatile organic field-effect transistor memory devices
Source: Royal Society of Chemistry journal article supplement (doi:10.1039/c9tc00756c), 2019-01-01
Supplement: c9tc00756c1.pdf [file c9tc00756c1.pdf]

*Electronic Supporting Information (ESI)*

**Pentafluorosulfanylated Polymers as Electrets in Nonvolatile  
Organic Field-Effect Transistor Memory Devices**

*Guoxian Zhang,<sup>a</sup> Yu-Jung Lee,<sup>b</sup> Prabhat Gautam,<sup>a</sup> Chia-Chi Lin,<sup>b</sup>  
Cheng-Liang Liu\*<sup>b</sup> and Julian M. W. Chan\*<sup>a</sup>*

<sup>a</sup> Department of Chemistry and Biomolecular Sciences,  
University of Ottawa,  
10 Marie Curie Private,  
Ottawa, ON, K1N 6N5, Canada  
E-mail: julian.chan@uottawa.ca

<sup>b</sup> Department of Chemical and Materials Engineering,  
National Central University,  
Taoyuan 32001, Taiwan  
E-mail: cliu@ncu.edu.tw

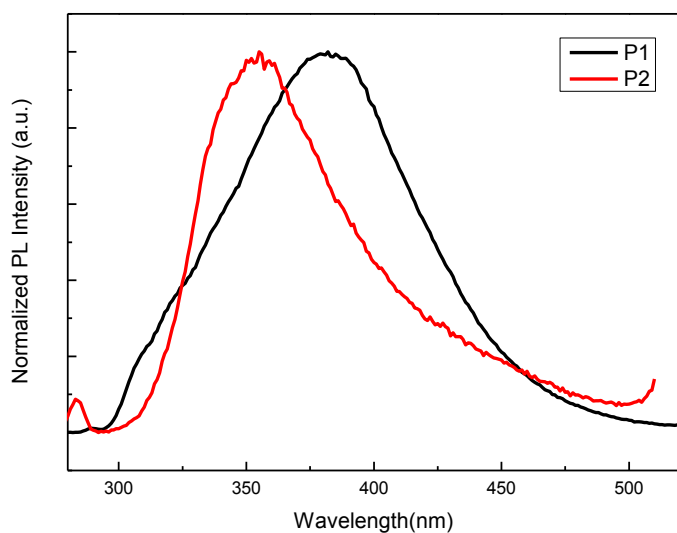

**Figure S1.** Fluorescence spectra of polymers **P1** and **P2**.

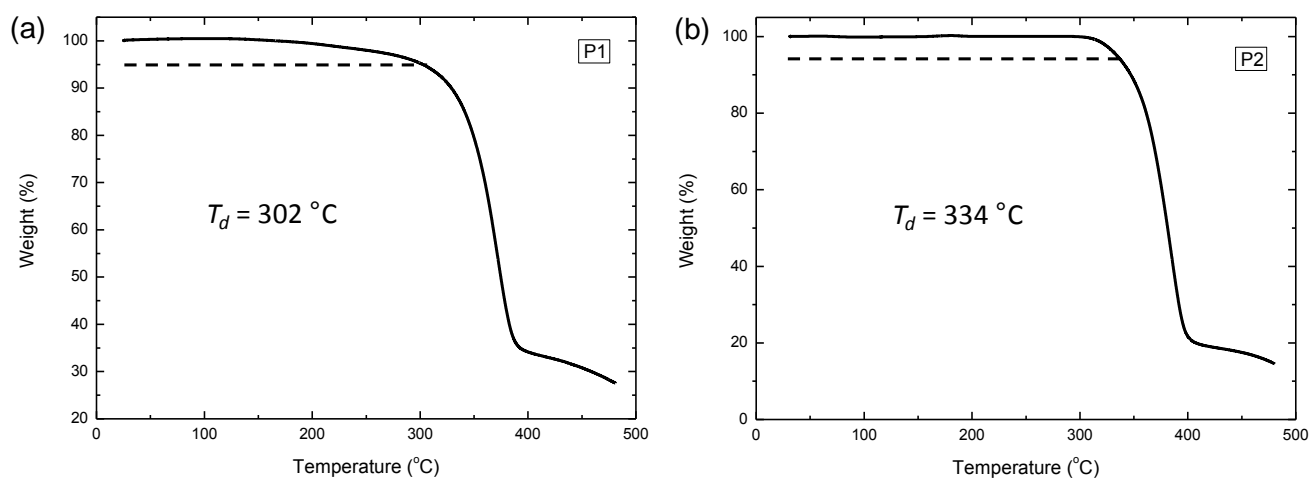

**Figure S2.** Thermogravimetric analysis of pentafluorosulfanylated polymers (a) **P1** and (b) **P2**.

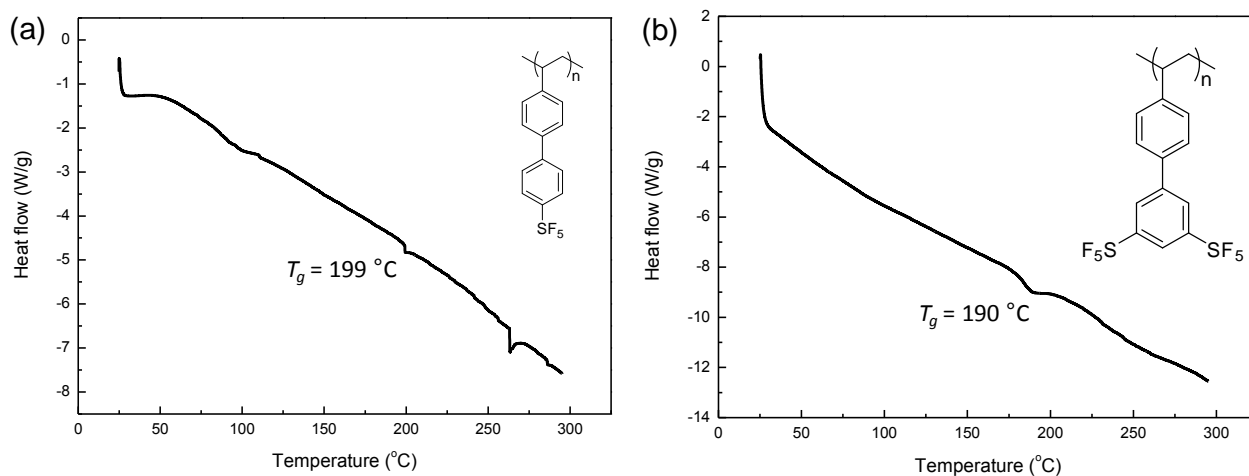

**Figure S3.** DSC curves of the pentafluorosulfanylated polymers (a) **P1** and (b) **P2**.

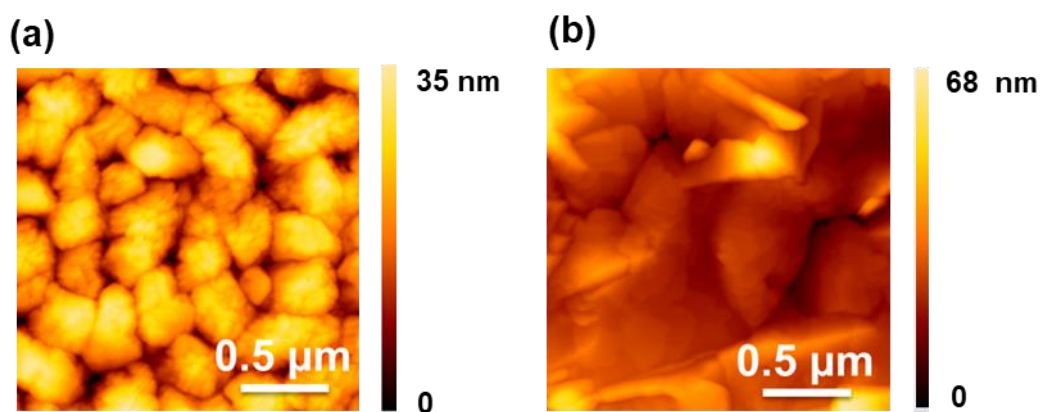

**Figure S4.** AFM topographic images of pentacene on (a) **P1** and (b) **P2** surface.

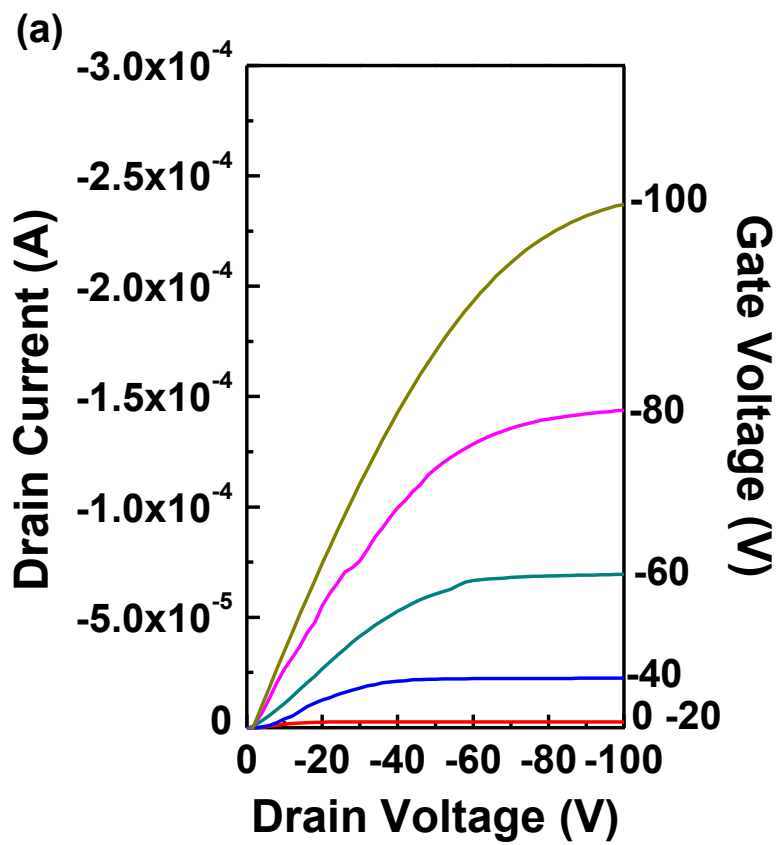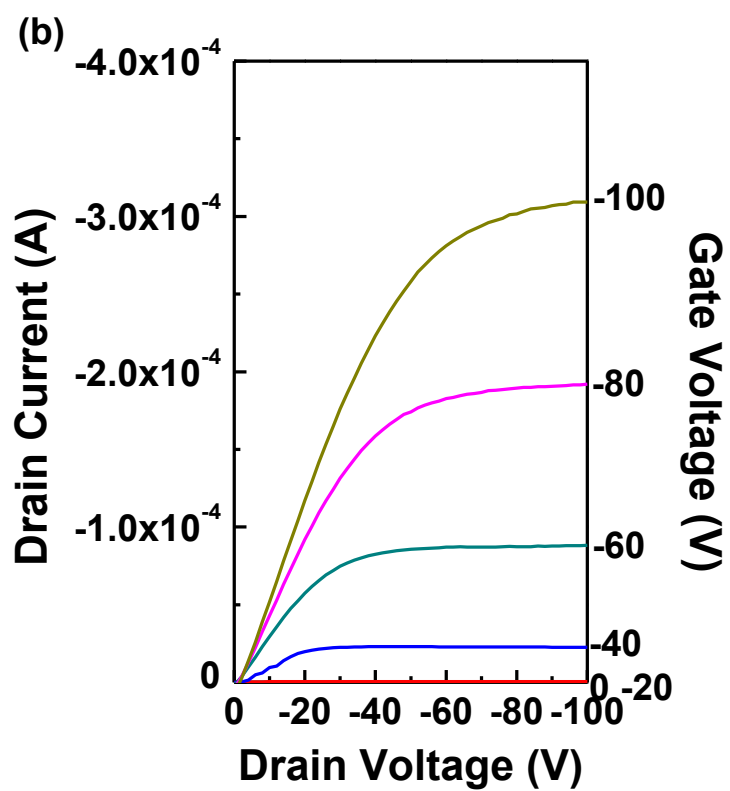

Figure S5. Output characteristics of OFET memories based on (a) P1 and (b) P2 electrets.

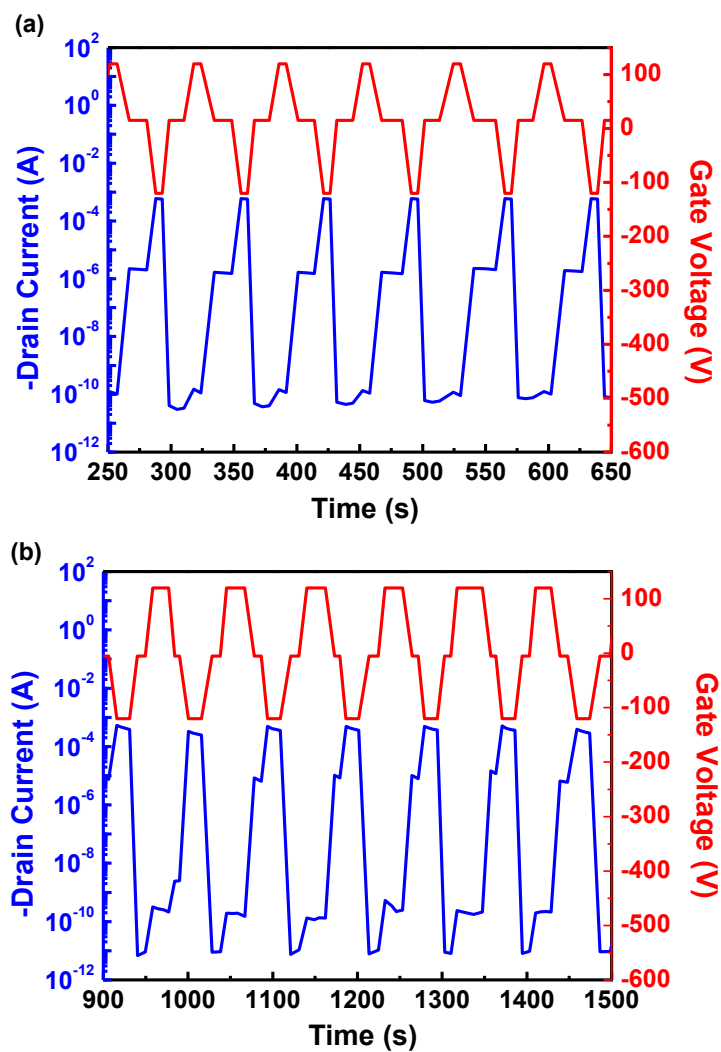

**Figure S6.**  $I_d$  response for the repeated pulse bias of PRER operations of OFET memories based on (a) **P1** and (b) **P2** electrets.

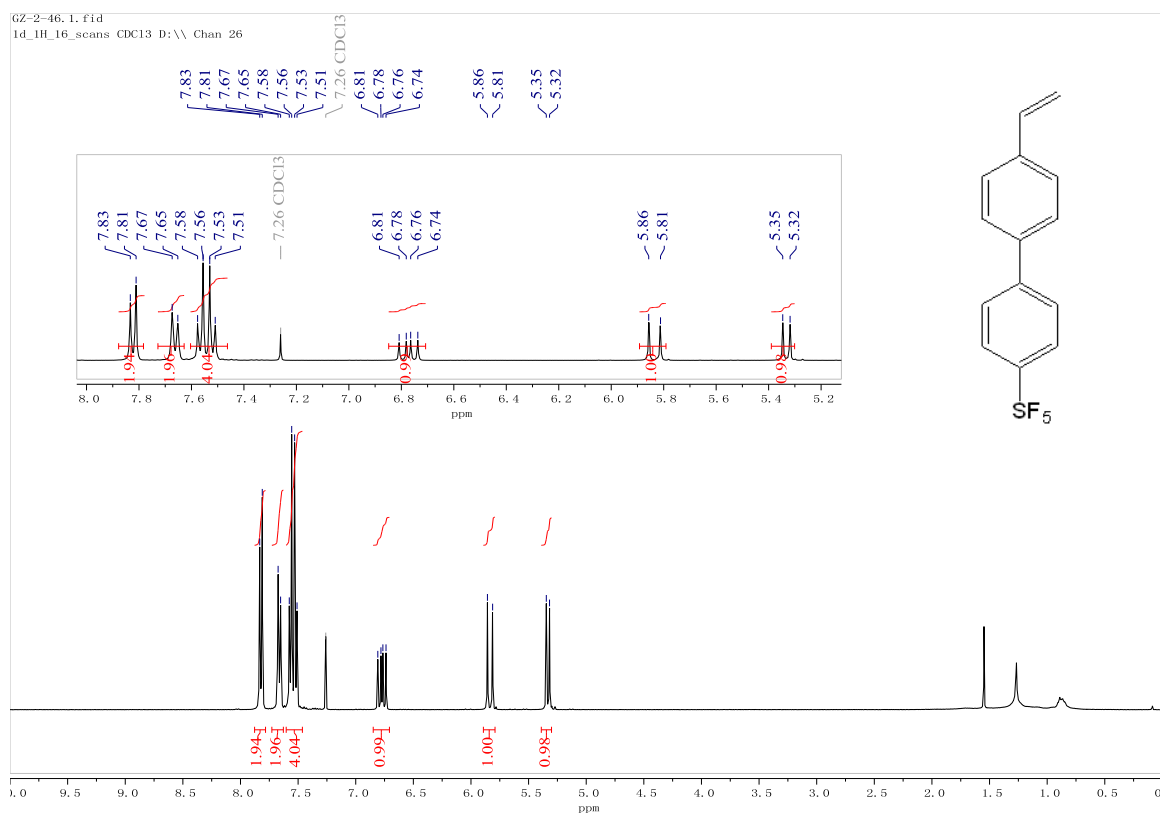

**Figure S7.**  $^1\text{H}$  NMR spectrum of compound 2.

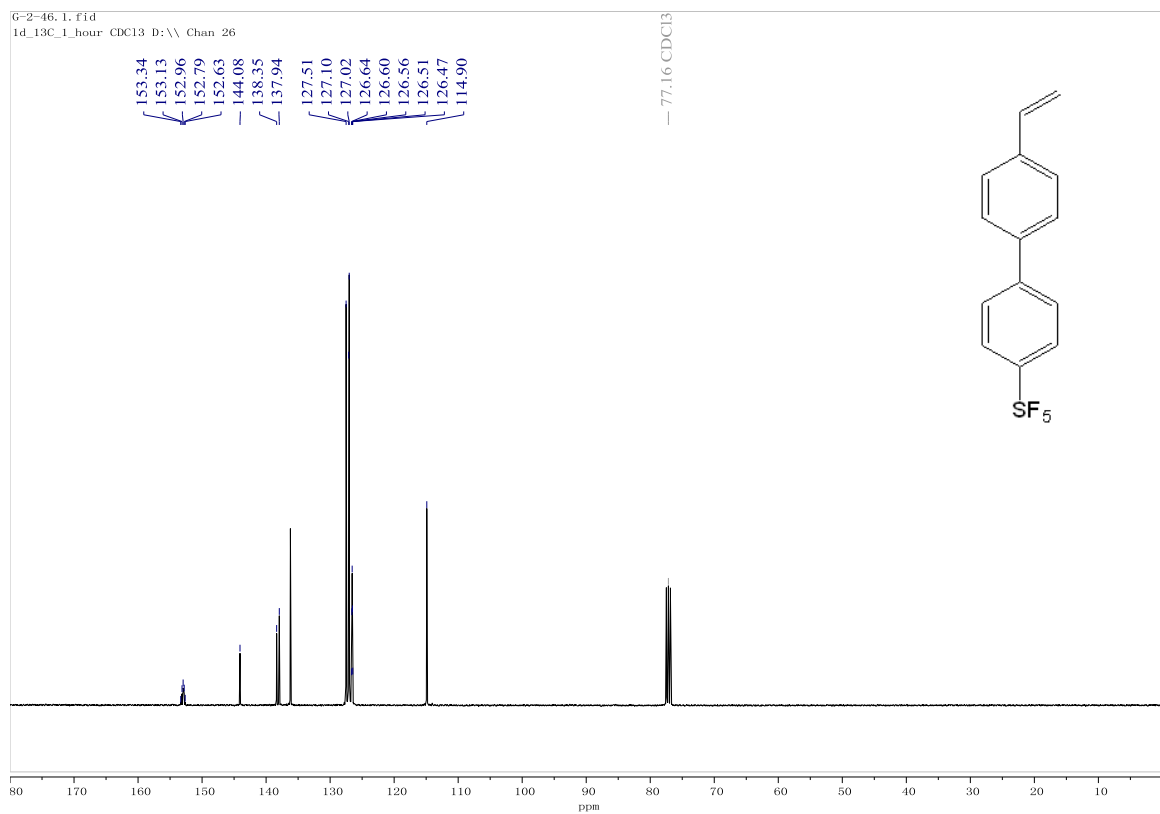

**Figure S8.**  $^{13}\text{C}$  NMR spectrum of compound 2.

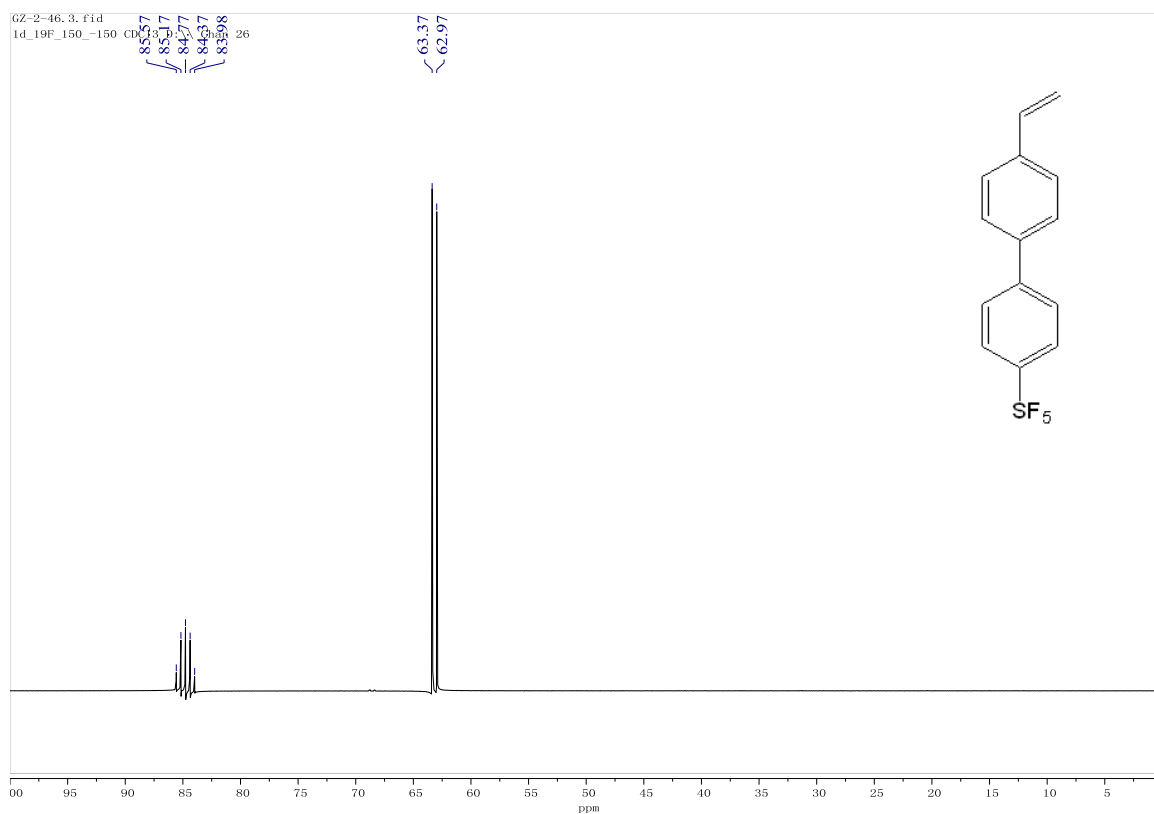

**Figure S9.** <sup>19</sup>F NMR spectrum of compound **2**.

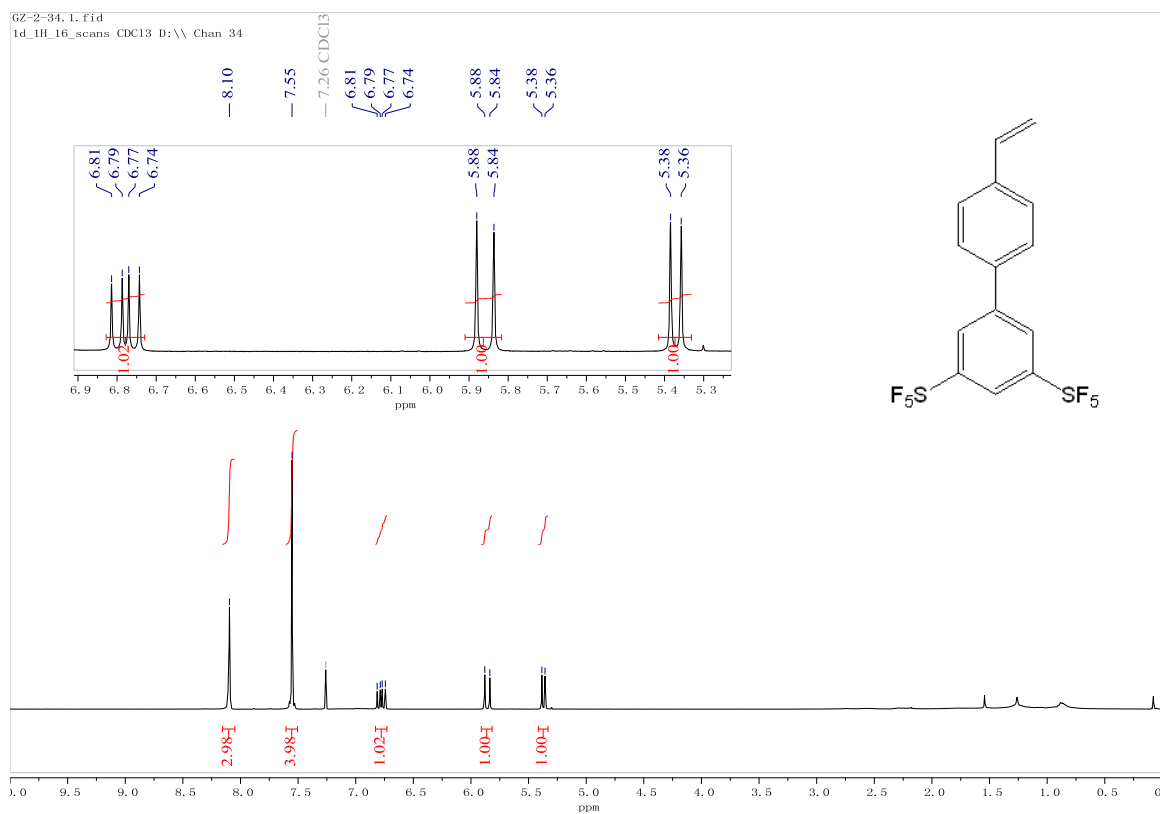

**Figure S10.** <sup>1</sup>H NMR spectrum of compound **3**.

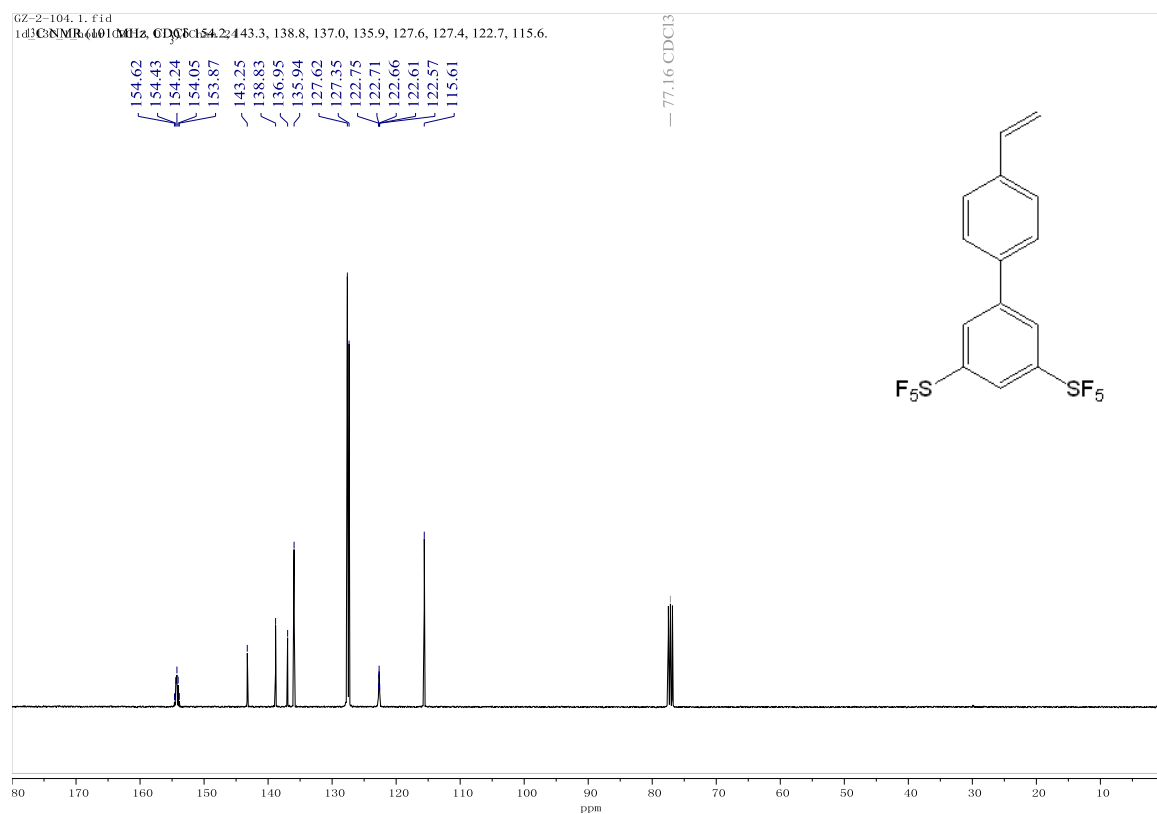

**Figure S11.** <sup>13</sup>C NMR spectrum of compound **3**.

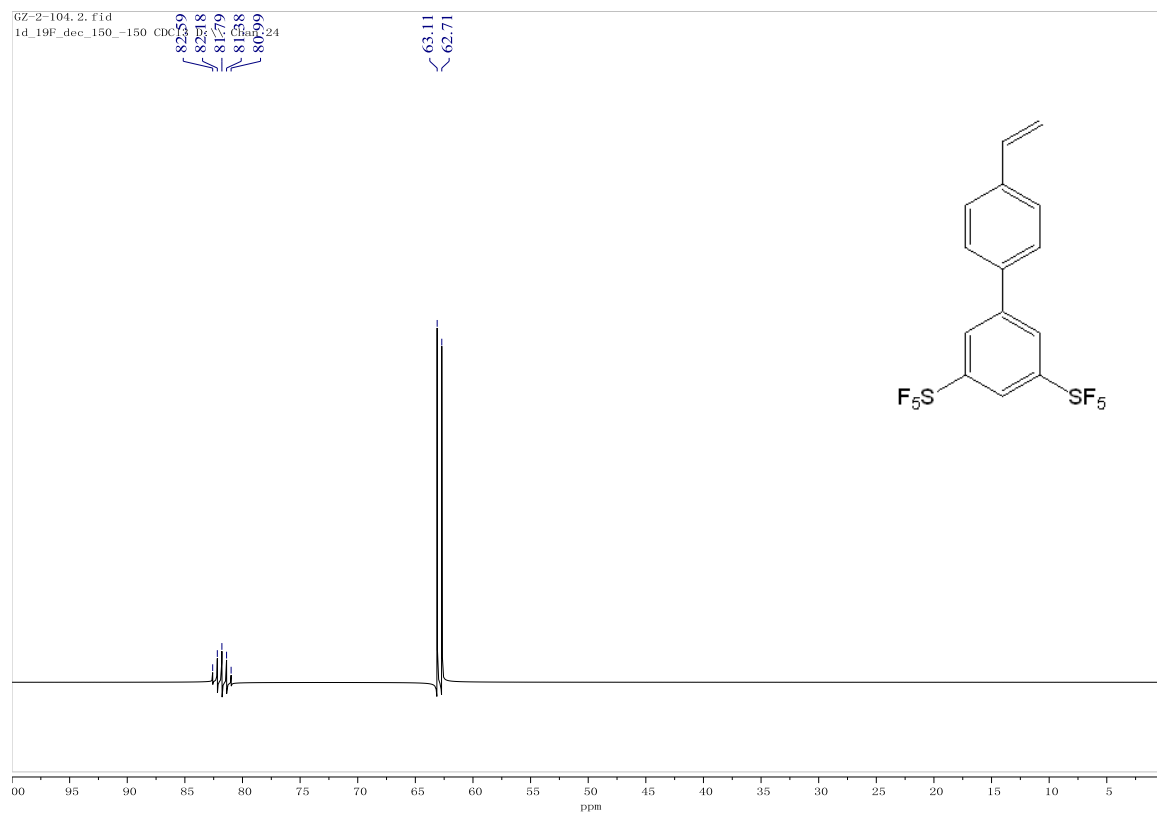

**Figure S12.** <sup>19</sup>F NMR spectrum of compound **3**.



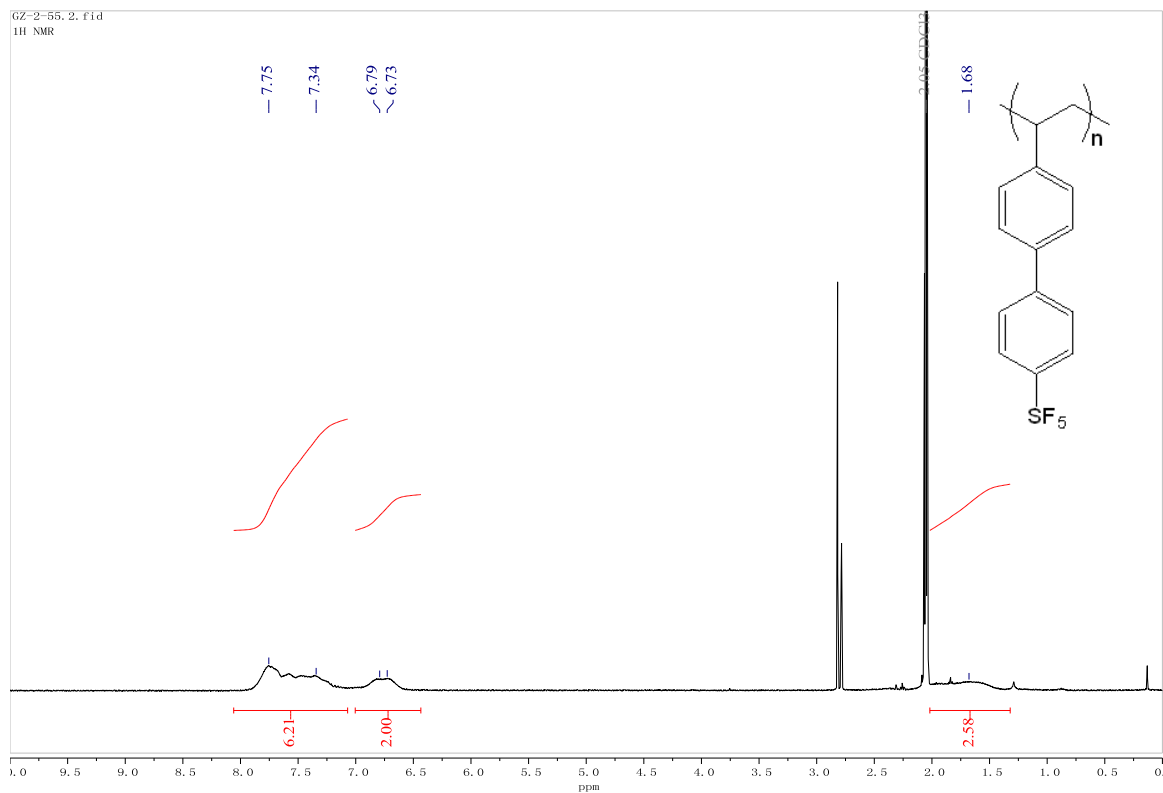

**Figure S13.**  $^1\text{H}$  NMR spectrum of polymer P1.

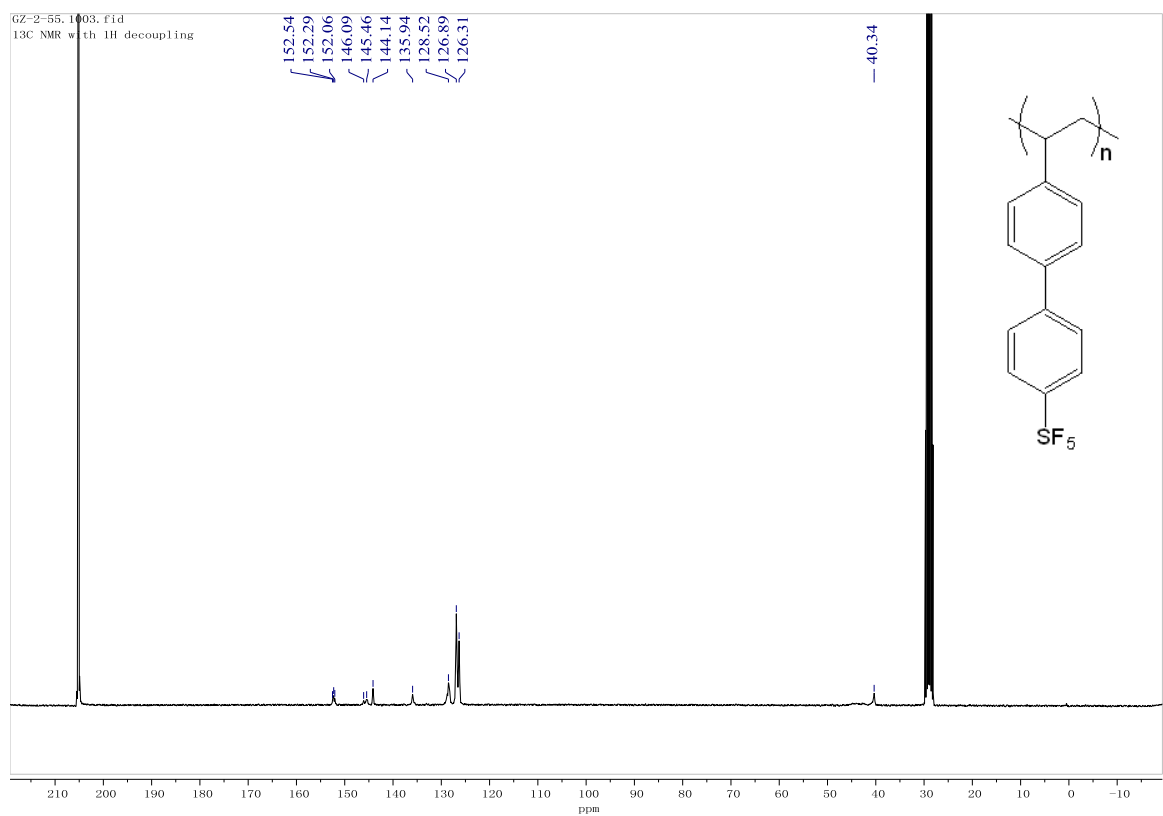

**Figure S14.**  $^{13}\text{C}$  NMR spectrum of polymer P1.

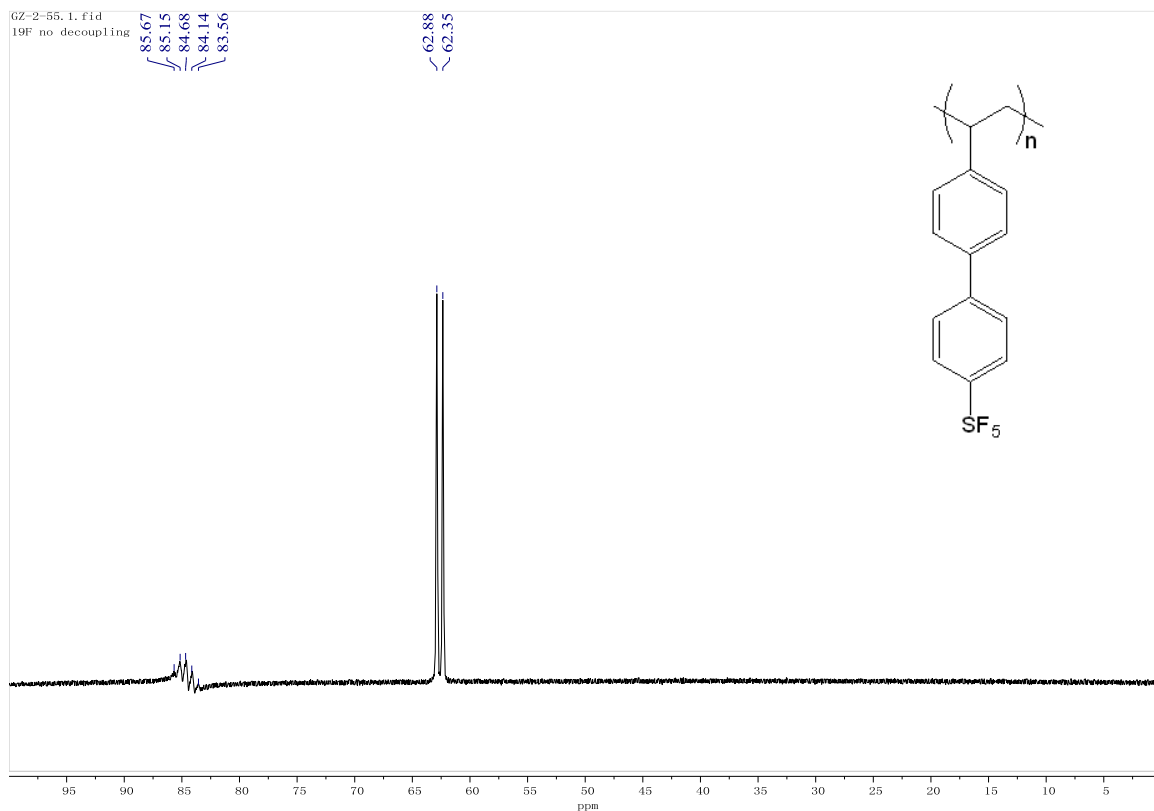

**Figure S15.**  $^{19}\text{F}$  NMR spectrum of polymer **P1**.

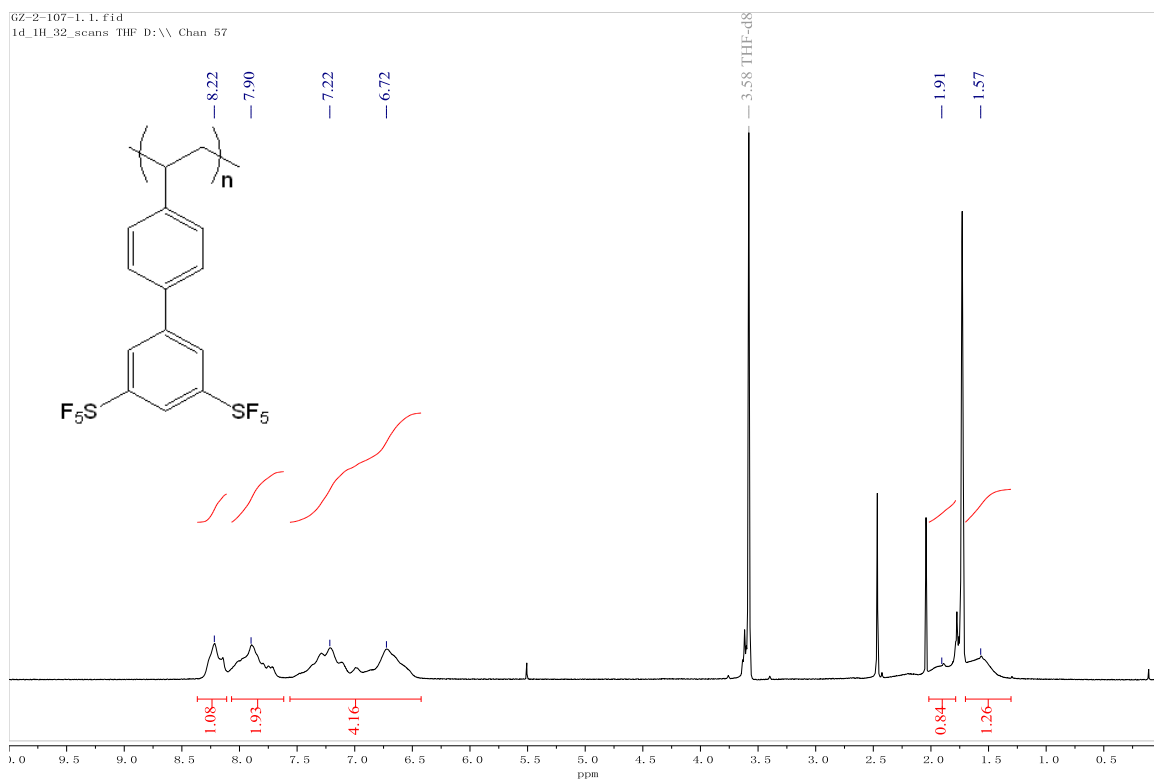

**Figure S16.**  $^1\text{H}$  NMR spectrum of polymer **P2**.

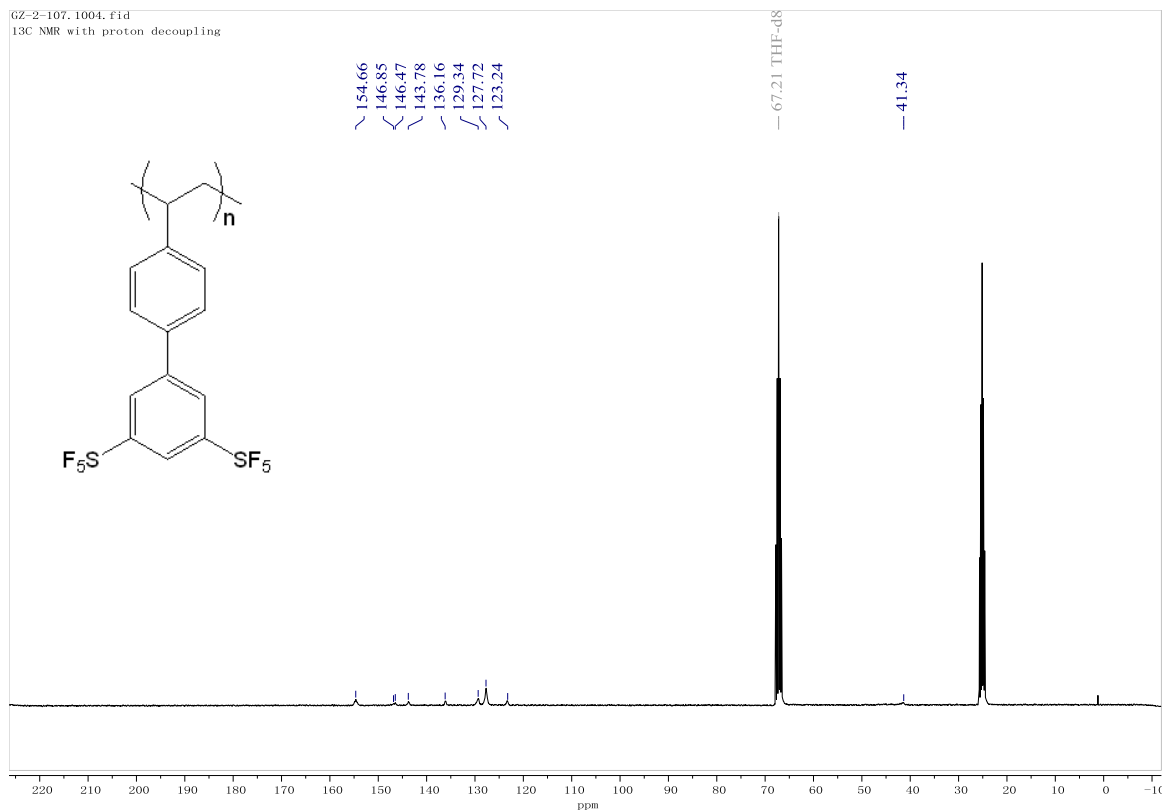

**Figure S17.**  $^{13}\text{C}$  NMR spectrum of polymer **P2**.

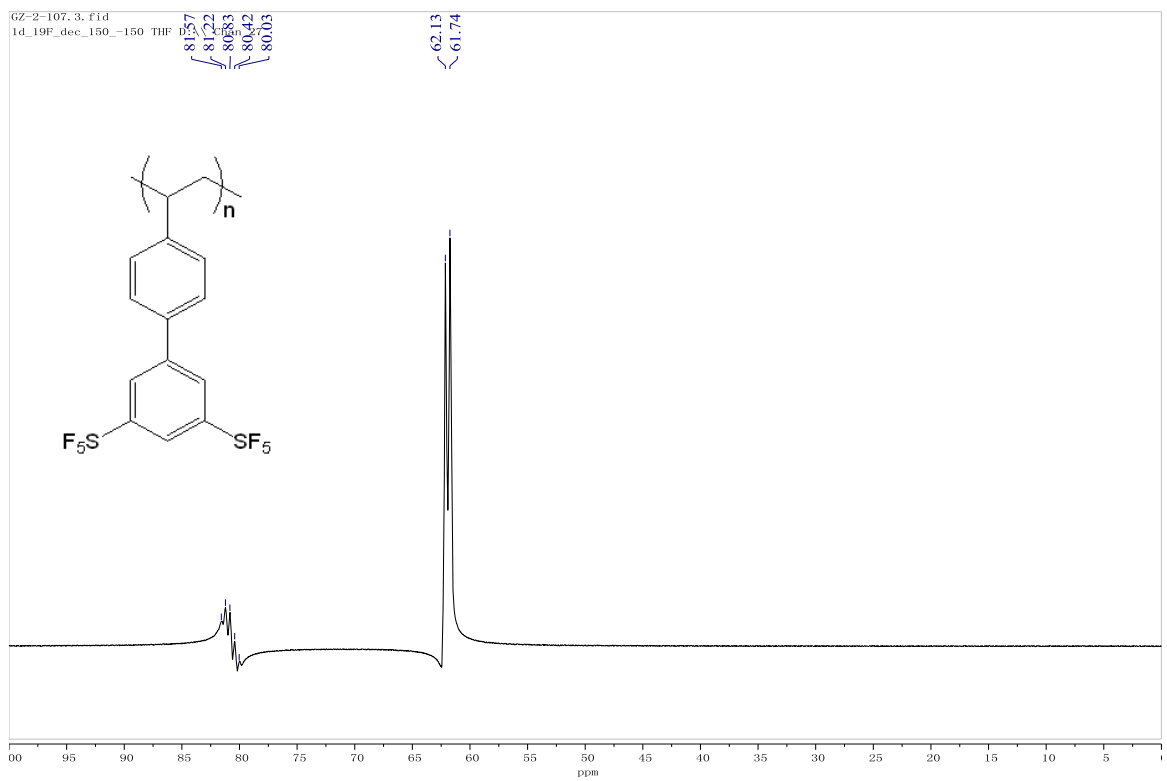

**Figure S18.**  $^{19}\text{F}$  NMR spectrum of polymer **P2**.

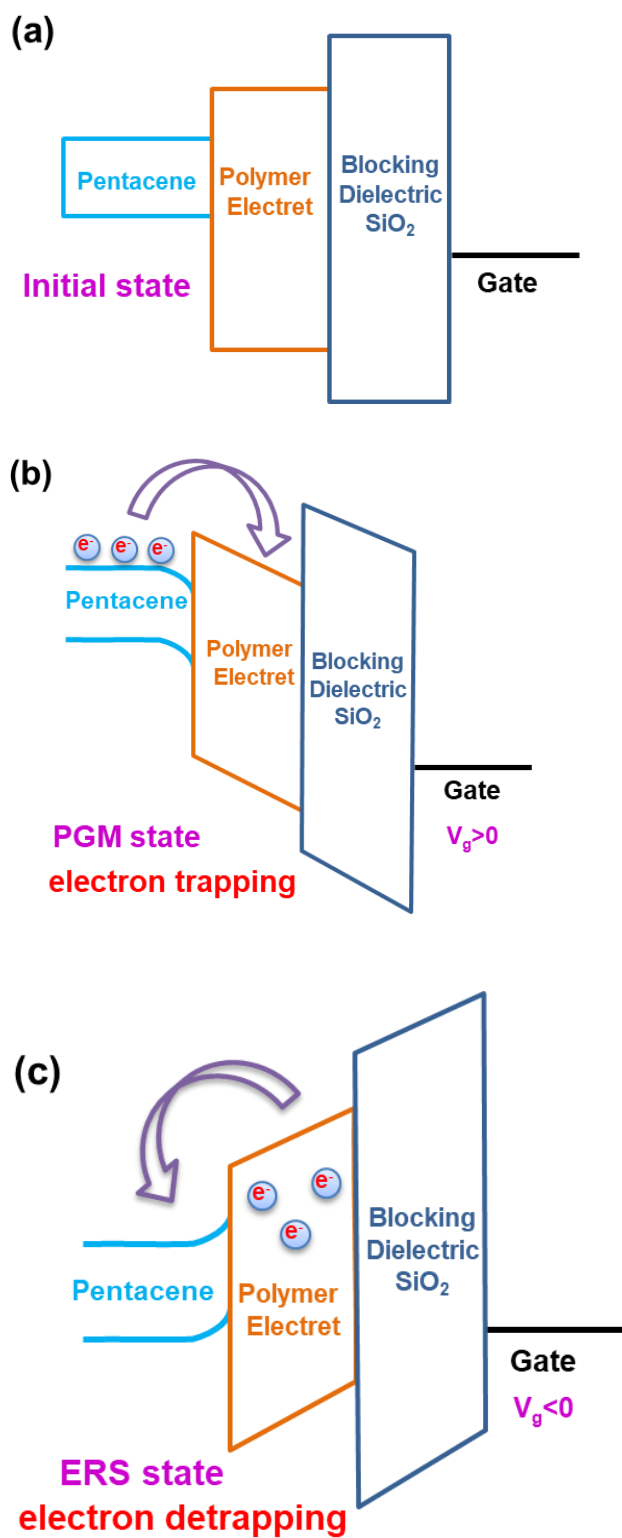

**Figure S19.** A schematic energy band diagram during (a) initial, (b) PGM, and (c) ERS operations for the charge trapping/detrapping mechanistic description.

**DFT Calculation Method:** Gaussian09 at the B3LYP/6-31G(d) level for C, N, S, and H

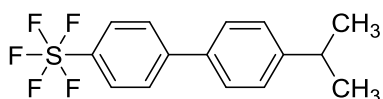

**Table S1.** Atomic coordinates for the representative model structure of the **P1** repeat unit.

| Center Number | Atomic Number | Atomic Type | Coordinates (Angstroms) |           |           |
|---------------|---------------|-------------|-------------------------|-----------|-----------|
|               |               |             | X                       | Y         | Z         |
| 1             | 6             | 0           | -4.124064               | -0.906091 | 0.459260  |
| 2             | 6             | 0           | -2.732954               | -0.943278 | 0.482130  |
| 3             | 6             | 0           | -1.971380               | 0.107299  | -0.057122 |
| 4             | 6             | 0           | -2.659831               | 1.192663  | -0.619882 |
| 5             | 6             | 0           | -4.052832               | 1.220889  | -0.644708 |
| 6             | 6             | 0           | -4.814585               | 0.176061  | -0.107238 |
| 7             | 1             | 0           | -4.679088               | -1.732038 | 0.897165  |
| 8             | 1             | 0           | -2.229347               | -1.785050 | 0.949841  |
| 9             | 1             | 0           | -2.100955               | 2.008818  | -1.069824 |
| 10            | 1             | 0           | -4.558861               | 2.069845  | -1.099144 |
| 11            | 6             | 0           | -0.488750               | 0.069676  | -0.034332 |
| 12            | 6             | 0           | 0.260845                | 1.233126  | 0.208005  |
| 13            | 6             | 0           | 0.208835                | -1.129500 | -0.256803 |
| 14            | 6             | 0           | 1.652555                | 1.208497  | 0.227722  |
| 15            | 1             | 0           | -0.251704               | 2.168752  | 0.409498  |
| 16            | 6             | 0           | 1.600275                | -1.172907 | -0.241200 |
| 17            | 1             | 0           | -0.343367               | -2.039158 | -0.472069 |
| 18            | 6             | 0           | 2.309800                | 0.001160  | 0.001469  |
| 19            | 1             | 0           | 2.211040                | 2.115004  | 0.424558  |
| 20            | 1             | 0           | 2.118690                | -2.105627 | -0.424780 |
| 21            | 16            | 0           | 4.130587                | -0.041819 | 0.021019  |
| 22            | 6             | 0           | -6.335776               | 0.226406  | -0.134686 |
| 23            | 1             | 0           | -6.617136               | 1.143824  | -0.669489 |
| 24            | 6             | 0           | -6.939221               | -0.961356 | -0.907536 |
| 25            | 1             | 0           | -8.029895               | -0.867240 | -0.966702 |
| 26            | 1             | 0           | -6.544851               | -1.012873 | -1.928147 |
| 27            | 1             | 0           | -6.715392               | -1.914430 | -0.413835 |
| 28            | 6             | 0           | -6.927061               | 0.321483  | 1.285103  |
| 29            | 1             | 0           | -6.528296               | 1.187989  | 1.823606  |
| 30            | 1             | 0           | -8.018372               | 0.417943  | 1.242262  |
| 31            | 1             | 0           | -6.694598               | -0.573867 | 1.873858  |
| 32            | 9             | 0           | 4.203247                | 0.802076  | 1.415463  |
| 33            | 9             | 0           | 4.242462                | 1.352400  | -0.819810 |
| 34            | 9             | 0           | 4.160075                | -1.439344 | 0.863251  |
| 35            | 9             | 0           | 4.193704                | -0.889045 | -1.371836 |
| 36            | 9             | 0           | 5.753578                | -0.079149 | 0.038020  |

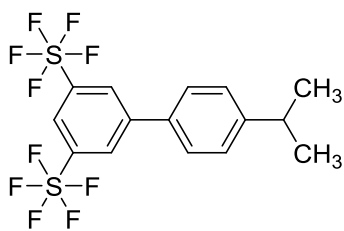

**Table S2.** Atomic coordinates for the representative model structure of the **P2** repeat unit.

| Center Number | Atomic Number | Atomic Type | Coordinates (Angstroms) |           |           |
|---------------|---------------|-------------|-------------------------|-----------|-----------|
|               |               |             | X                       | Y         | Z         |
| 1             | 6             | 0           | 1.317305                | 1.208146  | -0.014111 |
| 2             | 6             | 0           | -0.071400               | 1.161246  | -0.045631 |
| 3             | 6             | 0           | -0.732285               | -0.077342 | -0.043894 |
| 4             | 6             | 0           | 0.043246                | -1.247174 | -0.014488 |
| 5             | 6             | 0           | 1.430099                | -1.161201 | 0.006470  |
| 6             | 6             | 0           | 2.099991                | 0.058193  | 0.009739  |
| 7             | 1             | 0           | -0.646120               | 2.076806  | -0.093673 |
| 8             | 1             | 0           | -0.442666               | -2.213537 | 0.013980  |
| 9             | 1             | 0           | 3.178432                | 0.109476  | 0.030240  |
| 10            | 6             | 0           | -2.213690               | -0.148211 | -0.072376 |
| 11            | 6             | 0           | -2.876194               | -1.153801 | -0.792069 |
| 12            | 6             | 0           | -2.996299               | 0.790054  | 0.620965  |
| 13            | 6             | 0           | -4.268022               | -1.215300 | -0.814643 |
| 14            | 1             | 0           | -2.302046               | -1.877917 | -1.363787 |
| 15            | 6             | 0           | -4.385692               | 0.721517  | 0.593803  |
| 16            | 1             | 0           | -2.513682               | 1.564027  | 1.211715  |
| 17            | 6             | 0           | -5.052359               | -0.282892 | -0.124292 |
| 18            | 1             | 0           | -4.754667               | -2.000449 | -1.388670 |
| 19            | 1             | 0           | -4.957479               | 1.459407  | 1.150295  |
| 20            | 6             | 0           | -6.571958               | -0.362942 | -0.158904 |
| 21            | 1             | 0           | -6.833725               | -1.234769 | -0.773596 |
| 22            | 6             | 0           | -7.165768               | -0.591882 | 1.244069  |
| 23            | 1             | 0           | -8.254063               | -0.709520 | 1.185341  |
| 24            | 1             | 0           | -6.749876               | -1.491665 | 1.710111  |
| 25            | 1             | 0           | -6.958914               | 0.255583  | 1.908297  |
| 26            | 6             | 0           | -7.193772               | 0.877624  | -0.828424 |
| 27            | 1             | 0           | -6.800830               | 1.022078  | -1.840593 |
| 28            | 1             | 0           | -8.282754               | 0.771616  | -0.896301 |
| 29            | 1             | 0           | -6.983708               | 1.788082  | -0.254617 |
| 30            | 16            | 0           | 2.415423                | -2.700503 | 0.046066  |
| 31            | 16            | 0           | 2.150843                | 2.835286  | -0.018501 |
| 32            | 9             | 0           | 1.459525                | -3.356615 | 1.191140  |
| 33            | 9             | 0           | 3.401003                | -2.113582 | 1.202635  |
| 34            | 9             | 0           | 3.435008                | -2.146106 | -1.097189 |
| 35            | 9             | 0           | 3.287261                | -4.064395 | 0.078228  |
| 36            | 9             | 0           | 1.493640                | -3.389895 | -1.108504 |
| 37            | 9             | 0           | 3.228314                | 2.350329  | -1.139386 |
| 38            | 9             | 0           | 3.178046                | 2.378065  | 1.160272  |
| 39            | 9             | 0           | 2.887486                | 4.277416  | -0.019536 |
| 40            | 9             | 0           | 1.126592                | 3.427959  | 1.102604  |
| 41            | 9             | 0           | 1.176749                | 3.399942  | -1.196607 |
